# Supplementary material for: A Unique Pool of Compatible Solutes on Rhodopirellula baltica, Member of the Deep-Branching Phylum Planctomycetes
Source: PubMed Central journal article supplement (PMC3694870; doi:10.1371/journal.pone.0068289), 2013-06-27
Supplement: pone.0068289.s001.pdf [file pone.0068289.s001.pdf]

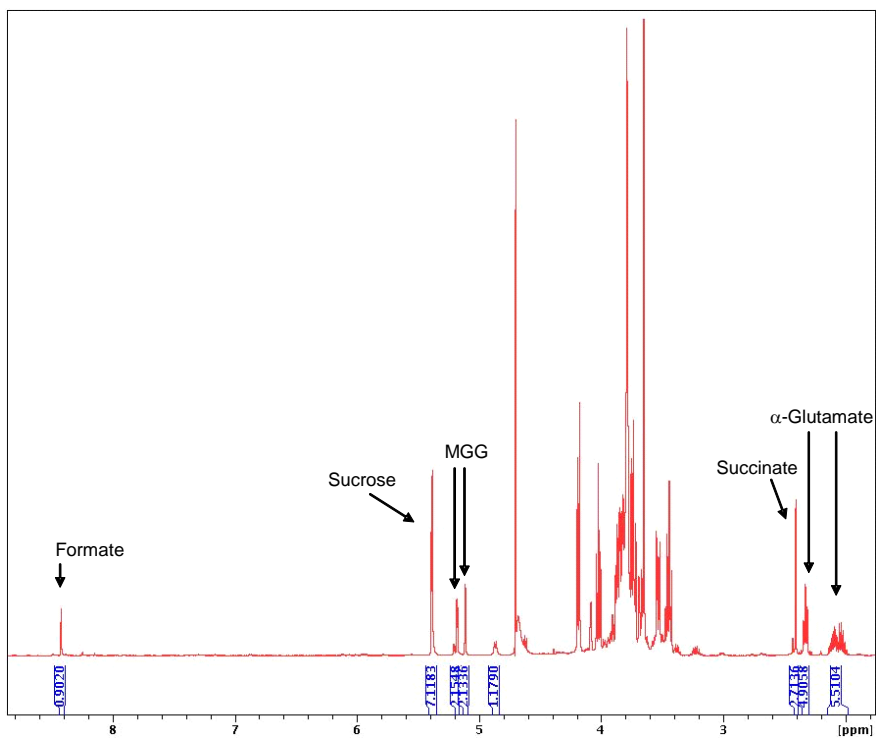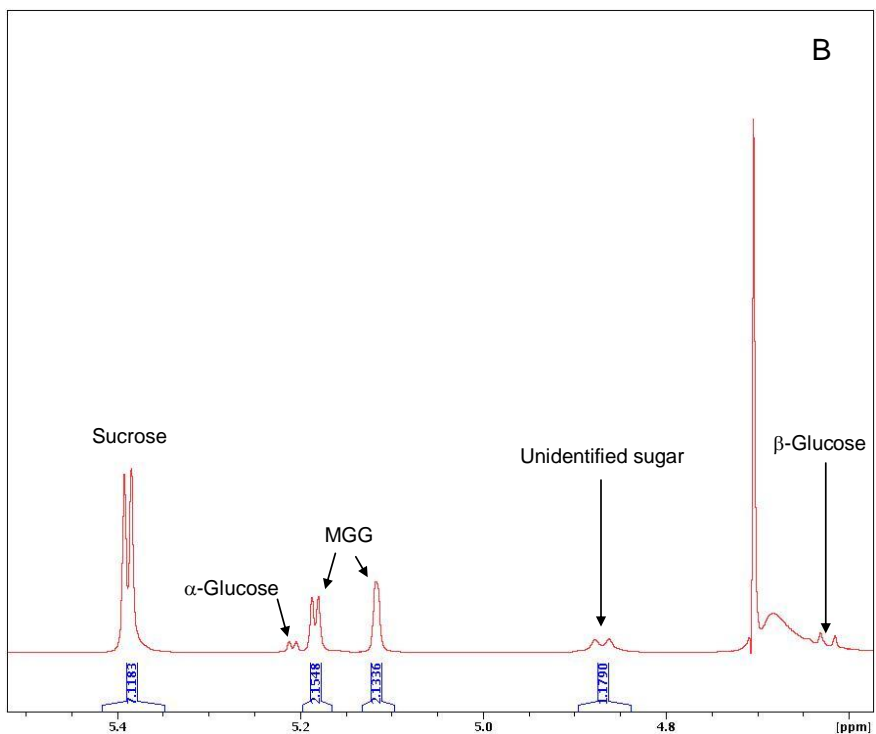

**Figure S1. *R. baltica* extract proton spectrum.** Proton spectrum (A) and sugar anomeric region of the proton spectrum (B) acquired at 800.33 MHz of an extract of *R. baltica* grown at 25°C with 150% ASW in N<sup>+</sup> medium.
